# Supplementary material
Source: PubMed Central journal article supplement (PMC3457401)
Supplement: AAC.01166-12_zac999101229so1.pdf [file AAC.01166-12_zac999101229so1.pdf]

Supplementary Information For:

**Characterization of a Rifampin Inactivating Glycosyltransferase from a Screen of Environmental Actinomycetes**

Peter Spanogiannopoulos, Maulik Thaker, Kalinka Koteva, Nicholas Waglechner, Gerard D. Wright

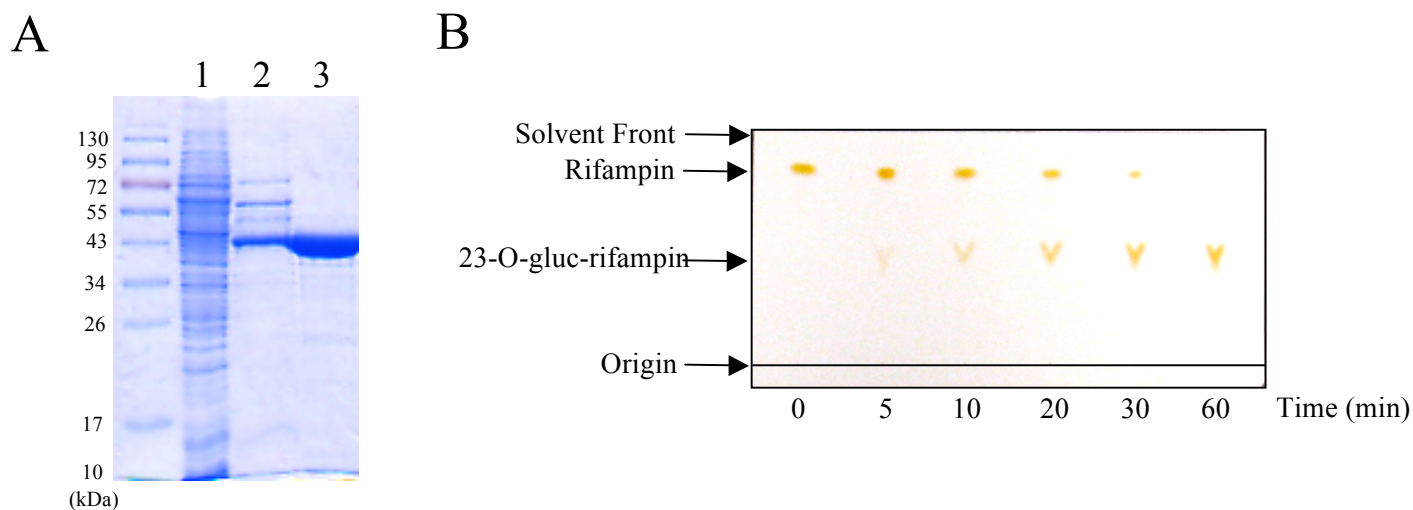

**Figure S1.** Purification and *in vitro* assay of recombinant Rgt1438. (A) SDS-PAGE analysis of purified Rgt1438. 1, Crude soluble protein fraction; 2, Nickel-affinity chromatography; 3, MonoQ chromatography. (B) Purified Rgt1438 was assayed as described in material and methods over 60 minutes. At specified time intervals, aliquots of the reaction were quenched with an equal volume of MeOH and product formation was assessed using TLC using conditions previously described (1).

**Table S1.** Oligonucleotide primers used in this study.

| Primer    | Sequence                               | Reference  |
|-----------|----------------------------------------|------------|
| F27       | 5'-AGAGTTTGATC(A/C)TGGCTCAG-3'         | 2          |
| R1432     | 5'-TACGG(C/T)TACCTTGTTACGACTT-3'       | 2          |
| rgtPartF  | 5'-ATGCATGAATTCCGAGGCGGCCGAGGGTTGT-3'  | This study |
| rgtPartR  | 5'-ATGCATAAGCTTCCGCGAGCGAGGACCACACG-3' | This study |
| rgtF      | 5'-ATCGATCATATGCGCATGCTGCTGACCAC-3'    | This study |
| rgtR      | 5'-ATGCATAAGCTTCCGACGGGGGCTGGACTC-3'   | This study |
| rgtR-pIJK | 5'-ATGCATGGATCCCCGACGGGGGCTGGACTC-3'   | This study |

**Table S2.**  $^1\text{H}$  Chemical shifts of Rifampin and 23-O-gluc-rifampin

| Proton                | Rifampin | 23-O-gluc-rifampin |
|-----------------------|----------|--------------------|
| 17                    | 6.24     | 6.17               |
| 18                    | 7.11     | 7.24               |
| 19                    | 5.91     | 5.95               |
| 20                    | 2.19     | 2.10               |
| 21                    | 3.76     | 3.72               |
| 22                    | 1.59     | 1.63               |
| 23                    | 2.83     | 3.33               |
| 24                    | 1.33     | 1.23               |
| 25                    | 5.07     | 5.07               |
| 26                    | 1.03     | 0.97               |
| 27                    | 3.23     | 3.23               |
| 28                    | 4.93     | 5.05               |
| 29                    | 6.19     | 6.13               |
| 30-CH <sub>3</sub>    | 1.90     | 1.90               |
| 31-CH <sub>3</sub>    | 0.84     | 0.82               |
| 32-CH <sub>3</sub>    | 0.89     | 0.88               |
| 33-CH <sub>3</sub>    | 0.43     | 0.51               |
| 34-CH <sub>3</sub>    | -0.26    | 0.06               |
| 36-CH <sub>3</sub>    | 1.97     | 1.94               |
| 37-CH <sub>3</sub>    | 2.89     | 2.89               |
| 13-CH <sub>3</sub>    | 1.63     | 1.64               |
| 14-CH <sub>3</sub>    | 1.90     | 1.87               |
| Pip-N-CH <sub>3</sub> | 2.80     | 2.84               |
| 1'                    | -        | 4.19               |
| 2'                    | -        | 2.85               |
| 3'                    | -        | 3.07               |
| 4'                    | -        | 2.97               |
| 5'                    | -        | 3.02               |
| 6'                    | -        | 3.38               |

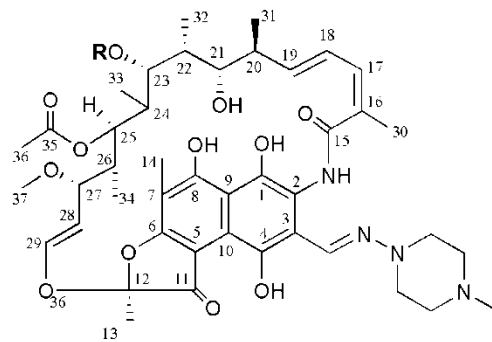

| Structure          | R |
|--------------------|---|
| Rifampin           | H |
| 23-O-gluc-rifampin |   |

**Table S3.**  $^{13}\text{C}$  Chemical shifts of Rifampin and 23-O-gluc-rifampin

| Carbon                | Rifampin | 23-O-gluc-rifampin |
|-----------------------|----------|--------------------|
| 17                    | 132.1    | 141.7              |
| 18                    | 127.9    | 126.6              |
| 19                    | 137.5    | 139.0              |
| 20                    | 38.0     | 39.9               |
| 21                    | 72.0     | 71.2               |
| 22                    | 33.0     | 35.5               |
| 23                    | 76.14    | 86.7               |
| 24                    | 37.6     | 29.3               |
| 25                    | 73.6     | 74.1               |
| 26                    | 39.9     | 40.3               |
| 27                    | 76.45    | 76.4               |
| 28                    | 117.7    | 118.5              |
| 29                    | 142.7    | 142.2              |
| 30-CH <sub>3</sub>    | 20.68    | 20.8               |
| 31-CH <sub>3</sub>    | 17.79    | 17.62              |
| 32-CH <sub>3</sub>    | 11.35    | 12.61              |
| 33-CH <sub>3</sub>    | 8.65     | 9.9                |
| 34-CH <sub>3</sub>    | 9.0      | 8.9                |
| 36-CH <sub>3</sub>    | 20.4     | 20.9               |
| 37-CH <sub>3</sub>    | 55.7     | 55.7               |
| 13-CH <sub>3</sub>    | 21.9     | 21.5               |
| 14-CH <sub>3</sub>    | 7.6      | 7.6                |
| Pip-N-CH <sub>3</sub> | 42.1     | 42.1               |
| 1'                    | -        | 103.0              |
| 2'                    | -        | 73.8               |
| 3'                    | -        | 76.6               |
| 4'                    | -        | 70.1               |
| 5'                    | -        | 76.8               |
| 6'                    | -        | 63.1               |

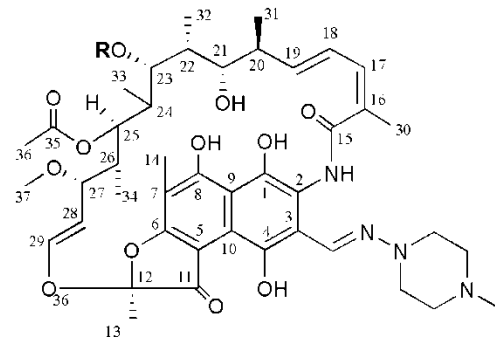

| Structure          | R |
|--------------------|---|
| Rifampin           | H |
| 23-O-gluc-rifampin |   |

**Table S4.** List of glycosyltransferases used for phylogenetic analysis

| Accession Number | Protein Name | Organism                                         |
|------------------|--------------|--------------------------------------------------|
| JX028276         | Rgt1438      | WAC1438 ( <i>Streptomyces speibonae</i> )        |
| ZP_08881278      |              | <i>Saccharopolyspora spinosa</i> NRRL 18395      |
| AAK84835         | Rgt          | <i>Nocardia brasiliensis</i>                     |
| YP_004920881     |              | <i>Streptomyces cattleya</i> NRRL 8057           |
| AEV85390         |              | <i>Actinoplanes</i> sp. SE50/110                 |
| YP_003340698     |              | <i>Streptosporangium roseum</i> DSM 43021        |
| YP_004961242     |              | <i>Streptomyces bingchenggensis</i> BCW-1        |
| EHI41633         |              | <i>Rhodococcus opacus</i> PD630                  |
| YP_703483        |              | <i>Rhodococcus jostii</i> RHA1                   |
| ZP_07299174      |              | <i>Streptomyces himastatinicus</i> ATCC 53653    |
| ZP_06912843      |              | <i>Streptomyces pristinaespiralis</i> ATCC 25486 |
| YP_001510066     |              | <i>Frankia</i> sp. EAN1pec                       |
| CAE53364         | GtfB         | <i>Actinoplanes teichomyceticus</i>              |
| AAB49293         | GtfB         | <i>Amycolatopsis orientalis</i>                  |
| AAB49299         | GtfE         | <i>Amycolatopsis orientalis</i>                  |
| CAE53349         | GtfA         | <i>Actinoplanes teichomyceticus</i>              |
| AAB49294         | GtfC         | <i>Amycolatopsis orientalis</i>                  |
| AAB49292         | GtfA         | <i>Amycolatopsis orientalis</i>                  |
| AAK31352         | GtfD         | <i>Amycolatopsis orientalis</i>                  |
| ADN6848          | SorF         | <i>Sorangium cellulosum</i>                      |
| ZP_08288521      |              | <i>Streptomyces griseoaurantiacus</i> M045       |
| YP_004811856     |              | <i>Streptomyces violaceusniger</i> Tu 4113       |
| YP_001157031     |              | <i>Salinispora tropica</i> CNB-440               |
| YP_004806303     |              | <i>Streptomyces</i> sp. SirexAA-E                |
| ZP_07301298      |              | <i>Streptomyces viridochromogenes</i> DSM 40736  |
| ZP_06581285      |              | <i>Streptomyces ghanaensis</i> ATCC 14672        |
| AAD44209         | RtfA         | <i>Mycobacterium avium</i>                       |
| AAF67506         | NovM         | <i>Streptomyces caeruleus</i>                    |
| AAD12163         | TyIN         | <i>Streptomyces fradiae</i>                      |
| BAC15749         | RebG         | <i>Lechevalieria aerocolonigenes</i>             |
| AAA26780         | Mgt          | <i>Streptomyces lividans</i>                     |
| AAC12648         | OleI         | <i>Streptomyces antibioticus</i>                 |
| Z22577           | OleD         | <i>Streptomyces antibioticus</i>                 |
| AAC68677         | DesVII       | <i>Streptomyces venezuelae</i>                   |
| BAB96658         | MurG         | <i>Escherichia coli</i>                          |

## References

1. **Yazawa, K., Y. Mikami, A. Maeda, M. Akao, N. Morisaki, and S. Iwasaki.** 1993. Inactivation of rifampin by *Nocardia brasiliensis*. *Antimicrob. Agents Chemother.* **37**:1313-1317.
2. **Heuer, H., M. Krsek, P. Baker, K. Smalla, and E. M. Wellington.** 1997. Analysis of actinomycete communities by specific amplification of genes encoding 16S rRNA and gel-electrophoretic separation in denaturing gradients. *Appl. Environ. Microbiol.* **63**:3233-3241.
